# Supplementary material for: Copy Number Variations Contribute to Intramuscular Fat Content Differences by Affecting the Expression of PELP1 Alternative Splices in Pigs
Source: MDPI journal article supplement (doi:10.3390/ani12111382), 2022-05-27
Supplement: s1 [file s1]

**Table S2.** Genes involved in the PPI network of PELP1

| #node  | coexpression | experimentally_<br>determined_int<br>eraction | database_<br>annotated | combined<br>_score | annotation                                                  |
|--------|--------------|-----------------------------------------------|------------------------|--------------------|-------------------------------------------------------------|
| AP3B1  | 0            | 0.873                                         | 0                      | 0.873              | AP-3 complex<br>subunit beta-1                              |
| AR     | 0            | 0.393                                         | 0.9                    | 0.977              | Androgen<br>receptor                                        |
| CDK11A | 0            | 0.847                                         | 0                      | 0.85               | Cyclin dependent<br>kinase 11A                              |
| CREBBP | 0.061        | 0.379                                         | 0.9                    | 0.955              | CREB-binding<br>protein                                     |
| EP300  | 0.061        | 0.379                                         | 0.9                    | 0.956              | Histone<br>acetyltransferase<br>p300                        |
| ESR1   | 0            | 0.433                                         | 0.9                    | 0.995              | Estrogen receptor<br>Hepatocyte                             |
| HGS    | 0            | 0.379                                         | 0                      | 0.782              | growth factor-<br>regulated<br>tyrosine kinase<br>substrate |
| IPO5   | 0.077        | 0.358                                         | 0                      | 0.439              | Importin-5                                                  |
| LAS1L  | 0.114        | 0.986                                         | 0.9                    | 0.999              | Ribosomal<br>biogenesis<br>protein LAS1L                    |
| MDN1   | 0.064        | 0.387                                         | 0                      | 0.51               | Midasin                                                     |
| NOL9   | 0.044        | 0.986                                         | 0.9                    | 0.998              | Polynucleotide<br>5'-hydroxyl-<br>kinase NOL9               |
| NOLC1  | 0.046        | 0.403                                         | 0                      | 0.406              | Nucleolar and<br>coiled-body<br>phosphoprotein 1            |
| NR3C1  | 0            | 0.321                                         | 0.9                    | 0.945              | Glucocorticoid<br>receptor                                  |
| NR4A1  | 0            | 0.414                                         | 0                      | 0.58               | Nuclear receptor<br>subfamily 4<br>group A member<br>1      |
| RB1    | 0            | 0.379                                         | 0                      | 0.445              | Retinoblastoma-<br>associated<br>protein                    |
| RPL11  | 0.087        | 0.358                                         | 0.9                    | 0.94               | 60S ribosomal<br>protein L11                                |

|        |       |       |     |       |                                                    |
|--------|-------|-------|-----|-------|----------------------------------------------------|
| RPL26  | 0.079 | 0.358 | 0.9 | 0.939 | Ribosomal protein L26                              |
| RUVBL1 | 0.11  | 0.41  | 0.9 | 0.942 | RuvB-like 1                                        |
| SEN3   | 0.086 | 0.888 | 0.9 | 0.994 | Sentrin-specific protease 3                        |
| SRC    | 0     | 0.433 | 0.9 | 0.986 | Proto-oncogene tyrosine-protein kinase Src         |
| STAT3  | 0     | 0.379 | 0   | 0.682 | Signal transducer and activator of transcription 3 |
| TEX10  | 0.107 | 0.888 | 0.9 | 0.996 | Testis-expressed protein 10                        |
| WDR18  | 0.151 | 0.888 | 0.9 | 0.994 | WD repeat-containing protein 18                    |
