# Supplementary material for: Copy Number Variations Contribute to Intramuscular Fat Content Differences by Affecting the Expression of PELP1 Alternative Splices in Pigs
Source: MDPI journal article supplement (doi:10.3390/ani12111382), 2022-05-27
Supplement: s1 [file s1]

**Table S4.** Phenotype comparison among the different CNV genotypes of 19 significant CNVs

| <b>CNVRs</b> | <b>genotype</b> | <b>mean</b> | <b>stdev</b> |
|--------------|-----------------|-------------|--------------|
| CNV11        | AA              | 2.91        | 0.10         |
|              | AG              | 2.73        | 0.12         |
|              | GG              | 3.48        | 0.62         |
| CNV150       | AA              | 3.06        | 0.12         |
|              | AC              | 2.65        | 0.11         |
|              | CC              | 2.45        | 0.14         |
| CNV657       | AC              | 2.39        | 0.14         |
|              | CC              | 2.92        | 0.09         |
| CNV223       | AA              | 2.31        | 0.08         |
|              | CC              | 3.37        | 0.12         |
| CNV466       | AA              | 2.69        | 0.08         |
|              | AC              | 3.48        | 0.23         |
|              | CC              | 5.17        | 1.87         |
| CNV698       | AA              | 2.43        | 0.08         |
|              | AG              | 2.88        | 0.11         |
|              | GG              | 3.75        | 0.27         |
| CNV846       | AA              | 2.63        | 0.08         |
|              | AC              | 2.80        | 0.18         |
|              | CC              | 4.01        | 0.31         |
| CNV149       | AA              | 2.93        | 0.11         |
|              | AC              | 2.76        | 0.16         |
|              | CC              | 2.77        | 0.13         |
| CNV385       | AA              | 2.72        | 0.12         |
|              | AC              | 2.94        | 0.12         |
|              | CC              | 2.90        | 0.18         |
| CNV653       | AA              | 2.91        | 0.08         |
|              | AC              | 1.93        | 0.23         |
|              | CC              | 2.07        | 0.13         |
| CNV771       | AA              | 2.78        | 0.08         |
|              | AG              | 4.10        | 1.04         |
|              | GG              | 4.59        | 0.56         |
| CNV49        | AA              | 2.77        | 0.13         |
|              | AG              | 2.99        | 0.12         |
|              | GG              | 2.56        | 0.14         |
| CNV35        | AA              | 2.89        | 0.14         |
|              | AG              | 2.85        | 0.11         |
|              | GG              | 2.83        | 0.18         |
| CNV450       | AA              | 2.76        | 0.29         |
|              | AG              | 2.75        | 0.11         |
|              | GG              | 2.97        | 0.12         |
| CNV422       | AA              | 2.98        | 0.22         |
|              | AG              | 2.95        | 0.11         |
|              | GG              | 2.65        | 0.11         |
| CNV148       | AA              | 2.44        | 0.16         |
|              | AC              | 2.64        | 0.09         |

---

|        |    |      |      |
|--------|----|------|------|
|        | CC | 3.31 | 0.15 |
|        | AA | 2.33 | 0.29 |
| CNV901 | AG | 2.98 | 0.13 |
|        | GG | 2.75 | 0.09 |
|        | AA | 3.12 | 0.12 |
| CNV160 | AC | 2.59 | 0.11 |
|        | CC | 2.35 | 0.17 |
|        | AA | 2.86 | 0.10 |
| CNV508 | AG | 2.90 | 0.13 |
|        | GG | 2.45 | 0.22 |

---
