# Supplementary material for: Copy Number Variations Contribute to Intramuscular Fat Content Differences by Affecting the Expression of PELP1 Alternative Splices in Pigs
Source: MDPI journal article supplement (doi:10.3390/ani12111382), 2022-05-27
Supplement: s1 [file s1]

**Table S3.** Primers for CNVs and PELP1 QPCR validation

| ID       | Primer sequence (5'-3')         | Length (bp) | Tm(°C) |
|----------|---------------------------------|-------------|--------|
| CNV150   | F: GGAAGTACCTCTGGAGCCTGA        | 196         | 60     |
|          | R: GGAAGCCACCTGACAGCGAGAT       |             |        |
| CNV223   | F: GGGTGAGAGGGAGTCCATTGTC       | 170         | 60     |
|          | R: TTGCTGTGGCTCTGGCGTAG         |             |        |
| CNV148   | F: TGGTCATGGTGGCTTCCTCCTT       | 153         | 60     |
|          | R: GGCTTGCTTGCTCCTGGTTCT        |             |        |
| CNV11    | F: AACTCCCAGGCATTCCCATTGT       | 117         | 60     |
|          | R: GCTCACAGCAACACCAGATCCT       |             |        |
| PELP1    | F: ACCTACATACACCACAGCTCACA      | 103         | 59     |
|          | R: GATAACGAATCCGACTAGGAACCAT    |             |        |
| PELP1-AS | F: CCACTCATCATCACTCACCTCTT      | 117         | 59     |
|          | R: CCGAAGCCAGGAGACACAGT         |             |        |
| GCG      | F: GCAATATGGCTTTAGAATACACCTCTTA | 104         | 60     |
|          | R: GTCACATAATCAAGATCGTGTTCACAAC |             |        |
| GAPDH    | F: AGGGCATCCTGGGCTACACT         | 166         | 59     |
|          | R: TCCACCACCCTGTTGCTGTAG        |             |        |
