# Supplementary material for: Copy Number Variations Contribute to Intramuscular Fat Content Differences by Affecting the Expression of PELP1 Alternative Splices in Pigs
Source: MDPI journal article supplement (doi:10.3390/ani12111382), 2022-05-27
Supplement: s1 [file s1]

**Table S1.** Overlapped IMF associated QTLs of significant CNVRs

| CNVR   | Chromosome | Start         | End           | Type | Overlapped QTLs            |
|--------|------------|---------------|---------------|------|----------------------------|
| CNV11  | 1          | 43146501      | 43151500      | Del  | -                          |
| CNV35  | 1          | 17445150<br>1 | 17445550<br>0 | Del  | -                          |
| CNV49  | 1          | 23616800<br>1 | 23617200<br>0 | Del  | QTL29591                   |
| CNV385 | 2          | 17955001      | 17967500      | Dup  | -                          |
| CNV422 | 2          | 82146001      | 82150000      | Del  | -                          |
| CNV450 | 2          | 14272200<br>1 | 14272500<br>0 | Del  | -                          |
| CNV466 | 3          | 25786001      | 25790000      | Dup  | -                          |
| CNV508 | 4          | 44804501      | 44809500      | Del  | QTL144/QTL18034            |
| CNV653 | 7          | 78876501      | 78952500      | Dup  | -                          |
| CNV657 | 7          | 79216001      | 79273500      | Dup  | -                          |
| CNV698 | 8          | 91666001      | 91675500      | Del  | -                          |
| CNV148 | 12         | 49181501      | 49205000      | Dup  | -                          |
| CNV149 | 12         | 49461001      | 49498500      | Dup  | -                          |
| CNV150 | 12         | 52194501      | 52220000      | Dup  | -                          |
| CNV160 | 13         | 25532501      | 25537500      | Dup  | -                          |
| CNV223 | 14         | 20385001      | 20388500      | Dup  | -                          |
| CNV771 | X          | 8710001       | 8835000       | Dup  | -                          |
| CNV846 | X          | 75184001      | 75198000      | Dup  | QTL24310/QTL24315/QTL24318 |
| CNV901 | Y          | 5446501       | 5449000       | Del  | -                          |
